# Supplementary material for: Association of serial lactate measurements with mortality in children with septic shock: a prospective cohort study
Source: Research Square preprint supplement (doi:10.21203/rs.3.rs-8495504/v1), 2026-01-16

**Supplementary Material**

**I. STUDY PROTOCOL**

**Sequential Assessment of Lactate, ScvO₂, and ΔPCO₂ in Pediatric Septic Shock and Their Association With Mortality: A Prospective Cohort Study**

**1. Background and Rationale**

Pediatric septic shock remains a leading cause of mortality worldwide, with an even greater impact in low- and middle-income countries (LMICs) where advanced hemodynamic monitoring is limited. Serial lactate, central venous oxygen saturation (ScvO₂), and veno-arterial CO₂ gap (ΔPCO₂) have been proposed as accessible biomarkers for detecting tissue hypoperfusion and guiding resuscitation. However, prospective evidence from LMIC settings, particularly from Southeast Asia, remains scarce.
This study aims to evaluate whether sequential changes in these markers during the first 48 hours of pediatric septic shock are associated with mortality.

**2. Objectives**

**Primary Objective**

To determine whether serial lactate measurements are associated with 28-day mortality among children with septic shock.

**Secondary Objectives**

1. To evaluate longitudinal trends of ScvO₂ and ΔPCO₂ in survivors vs. non-survivors.
2. To assess which biomarker provides the strongest prognostic value for early mortality.
3. To examine the discriminative accuracy of a multivariable prognostic model using serial biomarkers.

**3. Study Design**

A **prospective observational cohort** study conducted in a tertiary pediatric intensive care unit (PICU). No interventions were assigned; all treatments followed institutional clinical protocols.

**4. Study Setting**

Vietnam National Children’s Hospital, Hanoi, Vietnam - a large national referral center with a dedicated PICU serving >2,000 critically ill children per year.

**5. Eligibility Criteria**

**Inclusion Criteria**

- Children aged 1 month to 18 years
- Diagnosis of **septic shock**, defined according to *Surviving Sepsis Campaign 2020* pediatric criteria
- Admission to PICU during the study period
- Availability of baseline lactate measurement at admission

**Exclusion Criteria**

- None. All eligible patients were included.
- No missing mortality outcome.

**6. Study Procedures**

**6.1. Timing of Measurements**

Biomarkers were collected at four predefined time points:

- 0 hours (PICU admission)
- 6 hours
- 24 hours
- 48 hours

**6.2. Biomarkers Measured**

- Serum lactate (mmol/L)
- Central venous oxygen saturation (ScvO₂, %)
- Central venous to arterial CO₂ difference (ΔPCO₂, mmHg)

Other clinical and laboratory data were collected per routine care.

**7. Outcome Measures**

**Primary Outcome**

- **28-day all-cause mortality**

**Secondary Outcomes**

- Longitudinal changes in lactate, ScvO₂, and ΔPCO₂
- Prognostic performance (AUC, calibration) of multivariable models

**8. Sample Size Justification**

All consecutive eligible septic shock admissions during the study period were included (N = 81).
Given the exploratory nature of the study and limited available population, **no formal power calculation** was performed.

**9. Statistical Analysis Plan**

**9.1. Descriptive Analysis**

- Continuous variables: median (IQR) or mean (SE) as appropriate
- Categorical variables: counts and percentages

**9.2. Longitudinal Analysis**

Linear **mixed-effects models** with:

- Random intercept for patient
- Fixed effects: time, mortality, and time × mortality interaction

**9.3. Mortality Risk Model**

Because mortality events were limited (n = 17), **Firth logistic regression** was used to reduce small-sample bias. Predictors included:

- Baseline lactate
- CRP
- Albumin
- VIS at 1 hour
- Etiology
- Organ dysfunction count

**9.4. Model Performance**

- **Discrimination:** ROC curve, AUC (95% CI)
- **Calibration:** Brier score and Hosmer–Lemeshow test
- **Optimal cutoff** via Youden index

**9.5. Missing Data**

Missing data were minimal (<5%) and handled using **complete-case analysis**, with an assessment that missingness was random.

**10. Ethical Considerations**

- Approved by the Ethics Committee of Vietnam National Children’s Hospital.
- As this was an observational study collecting data from routine clinical care, **individual informed consent was waived** according to institutional and national regulations.
- No patient identifiers were stored; data were anonymized before analysis.

**11. Patient and Public Involvement**

Patients and families did not participate directly in study design or conduct due to the emergency nature of septic shock. Results will be made available to clinicians to improve future care pathways.

**12. Data management and sharing**

All study data were entered and stored in a secure, password-protected electronic database accessible only to the research team. De-identified datasets and the statistical analysis code supporting the findings of this study are not publicly available due to patient confidentiality and institutional data protection policies, but are available from the corresponding author upon reasonable request.

**13. Dissemination plan**

The findings of this study will be disseminated through publication in peer-reviewed scientific journals and presentation at national and international pediatric and critical care conferences

**II. Supplementary Figure S1. Flow diagram**


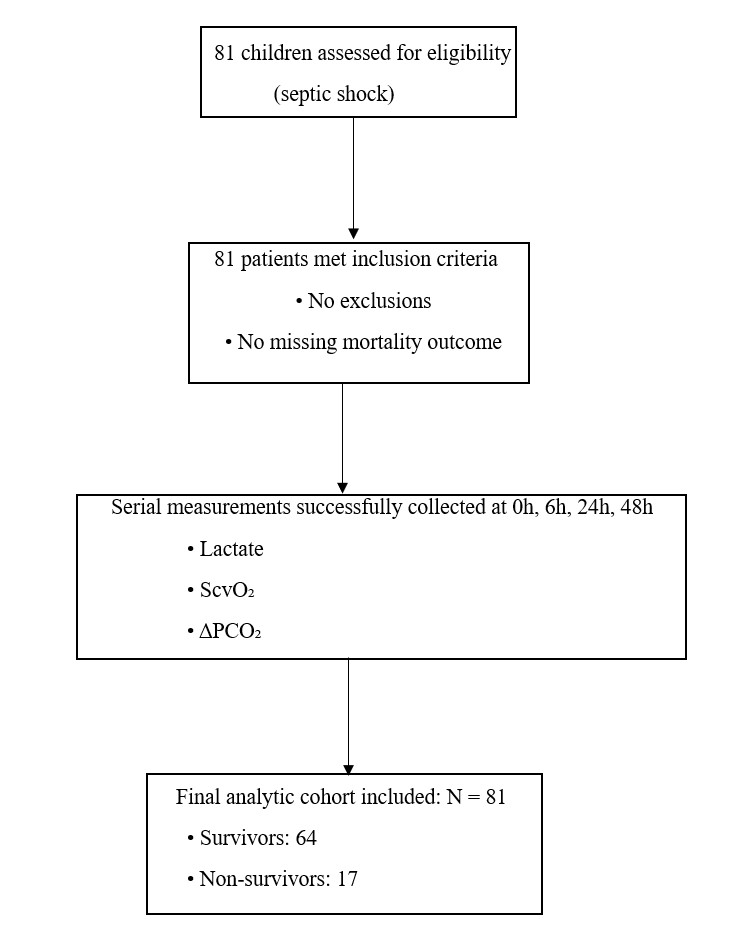

Supplement: Supplementary file 1 [file 1944cb2c3733a28f8f28822c.docx]
